# Supplementary material for: What Do District Health Managers in Ghana Use Their Working Time for? A Case Study of Three Districts
Source: PubMed Central journal article supplement (PMC4465977; doi:10.1371/journal.pone.0130633), 2015-06-11
Supplement: pone.0130633.s001.pdf [file pone.0130633.s001.pdf]

Time-use study 2013

|                                                                                                                                   |                                                                                                        |  |  |  |  |  |  |
|-----------------------------------------------------------------------------------------------------------------------------------|--------------------------------------------------------------------------------------------------------|--|--|--|--|--|--|
| <b>District:</b>                                                                                                                  | <b>Job title:</b>                                                                                      |  |  |  |  |  |  |
| Month                                                                                                                             |                                                                                                        |  |  |  |  |  |  |
| Date:                                                                                                                             |                                                                                                        |  |  |  |  |  |  |
| <b>Managing and monitoring service provision</b>                                                                                  | <b>Please note hours and minutes spent for activities such as:<br/>1:15, for 1 hour and 15 minutes</b> |  |  |  |  |  |  |
| Planning health activities/services/programmes                                                                                    |                                                                                                        |  |  |  |  |  |  |
| Organising and coordinating health activities/services/programmes                                                                 |                                                                                                        |  |  |  |  |  |  |
| Health service monitoring and evaluation                                                                                          |                                                                                                        |  |  |  |  |  |  |
| Health data management and reporting (incl. HMIS)                                                                                 |                                                                                                        |  |  |  |  |  |  |
| Writing project reports                                                                                                           |                                                                                                        |  |  |  |  |  |  |
| Community visits and community durbars                                                                                            |                                                                                                        |  |  |  |  |  |  |
| Research/study activities (including PERFORM)                                                                                     |                                                                                                        |  |  |  |  |  |  |
| <b>Human resource</b>                                                                                                             |                                                                                                        |  |  |  |  |  |  |
| Management of HR (including reporting for HR system)                                                                              |                                                                                                        |  |  |  |  |  |  |
| Training and supervision of staffs<br>(including preparation and organisation of such events)                                     |                                                                                                        |  |  |  |  |  |  |
| Staff durbars                                                                                                                     |                                                                                                        |  |  |  |  |  |  |
| <b>Material resources</b>                                                                                                         |                                                                                                        |  |  |  |  |  |  |
| Management of buildings, and of medical and technical equipment<br>(incl. procurement, maintenance, repairing and rehabilitation) |                                                                                                        |  |  |  |  |  |  |
| Drugstore management and provision of drugs to health facilities                                                                  |                                                                                                        |  |  |  |  |  |  |
| <b>Financing</b>                                                                                                                  |                                                                                                        |  |  |  |  |  |  |
| Management of finances and financial reporting                                                                                    |                                                                                                        |  |  |  |  |  |  |
| Preparation of insurance claims                                                                                                   |                                                                                                        |  |  |  |  |  |  |
| <b>General management activities</b>                                                                                              |                                                                                                        |  |  |  |  |  |  |
| DHMT/Committee meeting                                                                                                            |                                                                                                        |  |  |  |  |  |  |
| Other <i>planned</i> meetings and appointments<br>(including preparation and organisation of meetings)                            |                                                                                                        |  |  |  |  |  |  |
| Unplanned/emergency meeting                                                                                                       |                                                                                                        |  |  |  |  |  |  |
| Receiving unannounced visitors<br>(such as health staff, clients, etc.)                                                           |                                                                                                        |  |  |  |  |  |  |
| Participation in government workgroup, workshop, or conference                                                                    |                                                                                                        |  |  |  |  |  |  |

Time-use study 2013

|                                                                                    |                           |           |            |            |            |           |           |           |
|------------------------------------------------------------------------------------|---------------------------|-----------|------------|------------|------------|-----------|-----------|-----------|
|                                                                                    | Month:                    |           |            |            |            |           |           |           |
|                                                                                    | Date:                     |           |            |            |            |           |           |           |
| Participation in third party (donor, NGO, etc.) workgroup, workshop, or conference |                           |           |            |            |            |           |           |           |
| Phone calls, mailing or letter writing/delivering                                  |                           |           |            |            |            |           |           |           |
| Self-study                                                                         |                           |           |            |            |            |           |           |           |
| <b>Clinical activities</b>                                                         |                           |           |            |            |            |           |           |           |
| Delivery of health promotion and prevention services                               |                           |           |            |            |            |           |           |           |
| Provision of clinical/curative services                                            |                           |           |            |            |            |           |           |           |
| <b>Other activities not mentioned above (please specify)</b>                       |                           |           |            |            |            |           |           |           |
|                                                                                    |                           |           |            |            |            |           |           |           |
|                                                                                    |                           |           |            |            |            |           |           |           |
|                                                                                    |                           |           |            |            |            |           |           |           |
| <b>Non-productive activities</b>                                                   |                           |           |            |            |            |           |           |           |
| Waiting for the activity to start                                                  |                           |           |            |            |            |           |           |           |
| Travelling                                                                         |                           |           |            |            |            |           |           |           |
| No activity due to electricity breakdown                                           |                           |           |            |            |            |           |           |           |
| Break                                                                              |                           |           |            |            |            |           |           |           |
| Devotion                                                                           |                           |           |            |            |            |           |           |           |
| Private social commitment                                                          |                           |           |            |            |            |           |           |           |
| <b>Total day:</b>                                                                  |                           |           |            |            |            |           |           |           |
|                                                                                    |                           | <i>Mo</i> | <i>Tue</i> | <i>Wed</i> | <i>Thu</i> | <i>Fr</i> | <i>Sa</i> | <i>Su</i> |
|                                                                                    | <b>morning: from</b>      |           |            |            |            |           |           |           |
|                                                                                    | <b>to</b>                 |           |            |            |            |           |           |           |
|                                                                                    | <b>afternoon: from</b>    |           |            |            |            |           |           |           |
|                                                                                    | <b>to</b>                 |           |            |            |            |           |           |           |
|                                                                                    | <b>Total hours worked</b> |           |            |            |            |           |           |           |
| <b>Absence in days (tick)</b>                                                      |                           |           |            |            |            |           |           |           |
|                                                                                    | <b>on leave:</b>          |           |            |            |            |           |           |           |
|                                                                                    | <b>sick leave:</b>        |           |            |            |            |           |           |           |
|                                                                                    | <b>public holiday:</b>    |           |            |            |            |           |           |           |
